# Supplementary material
Source: publisher figshare collection journal article supplement (https://geolsoc.figshare.com/ndownloader/files/5426870)
Supplement: Supplementary file 1 [file 5426870]

Table 3- EPMA monazite data
Spot No.	Th (wt%)	U (wt%)	Pb (wt%)	Dy (wt%)	Age (Ma)	1SD
Sample SH-10 (n=45)
10_1	3.3427	0.391724785	0.240737871	0.4275	1125	53
10_2	3.9684	0.35070699	0.227538749	0.0001	970	48
10_3	3.811	0.388019569	0.222456412	0.0582	955	49
10_4	3.8233	0.376316998	0.178189822	0.0469	776	48
1.2	3.8654	0.365065921	0.234303254	0.074	1008	49
1.4	3.8417	0.384163558	0.207728908	0.041	892	48
1.12	3.677	0.290037013	0.214071521	0.0623	1009	52
1.13	3.9036	0.362747366	0.203554725	0.043	876	48
1.14	3.7462	0.295759945	0.221936425	0.0705	1025	51
1.16	3.5199	0.318547091	0.200275665	0.0211	959	53
1.17	3.7143	0.411925963	0.23232483	0.1304	998	48
1.21	3.5087	0.454840489	0.201184684	0.4212	880	49
1.22	3.7643	0.348509007	0.221662883	0.0716	985	49
1.23	3.8199	0.343445351	0.20734281	0.0001	918	49
1.24	3.8749	0.347186699	0.208925856	0.0859	912	49
1.25	3.8545	0.407456817	0.199720424	0.0285	844	47
1.26	3.6253	0.464868146	0.218966617	0.3644	928	48
1.27	3.5684	0.392542643	0.219936882	0.0998	987	50
1.28	3.757	0.471169882	0.249315773	0.3411	1021	47
1.29	3.8949	0.427319916	0.242562587	0.1027	997	46
1.3	3.9181	0.434126448	0.253655583	0.1446	1032	46
1.31	3.3697	0.506099628	0.250400156	0.6515	1077	49
1.32	3.7362	0.379343336	0.213518766	0.1015	937	49
1.33	3.8991	0.376884892	0.224539253	0.0788	955	47
1.34	2.9923	0.483546816	0.238762597	0.6845	1124	52
1.35	2.9977	0.428601785	0.196457893	0.5216	971	53
1.36	3.5982	0.614694137	0.097701682	0.3046	390	41
1.37	3.0719	0.485383022	0.22420108	0.6288	1041	52
1.39	3.6121	0.415578223	0.232073506	0.2392	1014	49
1.4	3.2187	0.502158837	0.255815892	0.6635	1133	50
1.41	3.2284	0.500877947	0.258259443	0.6314	1142	50
1.42	3.4748	0.492123185	0.233340356	0.4427	997	49
1.43	3.5563	0.398343546	0.245352618	0.3122	1093	50
1.44	2.4353	0.360291713	0.188216306	0.4995	1123	66
2.5	3.2506	0.474792819	0.249321037	0.6748	1119	51
2.7	2.1993	0.219359748	0.154414033	0.5621	1144	80
2.8	3.4938	0.449364742	0.22074482	0.7459	968	49
3.3	3.7204	0.423575095	0.223621133	0.0977	955	47
3.4	3.6299	0.412529786	0.239494101	0.0334	1044	49
3.5	3.7729	0.42993729	0.239048227	0.0684	1004	47
3.6	3.617	0.363137361	0.238946777	0.2498	1078	50
3.7	3.419	0.285188509	0.18822575	0.4711	945	55
3.8	3.7676	0.456481488	0.22992758	0.075	952	46
3.9	3.8596	0.437414288	0.256064226	0.075	1050	47
3.1	3.9313	0.441516372	0.244685295	0.0882	990	45
SH-11 (in matrix; n=112)
C1-6	3.522	0.7535	0.268322208	0.1428	971	44
C1-7	3.6724	0.8347	0.278281278	0.107	943	41
C1-8	3.4522	0.7919	0.272812407	0.1577	977	44
C1-9	3.9296	1.0639	0.32215961	0.1478	942	36
C1-10	3.9857	0.972	0.340653779	0.1245	1026	37
C1-11	3.8216	0.8412	0.30908307	0.1199	1016	40
C1-12	3.2561	0.7435	0.271888426	0.1252	1031	46
C1-13	3.6508	0.8225	0.300863765	0.1438	1024	41
Table 4 - EPMA monazite data
Spot No.	Th (wt%)	U (wt%)	Pb (wt%)	Dy (wt%)	Age (Ma)	1SD
SH-11 (in matrix) contd.
C1-14	3.8461	0.8512	0.299668078	0.1223	979	40
C1-15	3.6913	0.8289	0.283199352	0.1587	959	41
C1-16	3.5115	0.806	0.257563963	0.102	911	43
C1-17	3.5139	0.846	0.284424089	0.1542	980	42
C1-18	3.8938	0.9973	0.304136685	0.1326	923	37
C1-19	3.9111	1.0239	0.282394303	0.1568	848	37
C1-20	3.1975	0.8499	0.285188261	0.1285	1028	43
C1-21	3.2653	0.8902	0.268741853	0.1204	942	42
C1-22	3.4685	0.8553	0.288976569	0.1821	997	42
C1-23	3.6188	0.9024	0.292928313	0.1457	965	41
C1-24	3.1597	0.6611	0.228950862	0.1116	935	48
C1-25	3.2727	0.5942	0.186300682	0.1016	784	49
C1-26	3.1877	0.6081	0.236925551	0.1291	991	50
C1-27	3.5757	0.8133	0.25341673	0.1389	885	43
C1-28	3.9294	0.9554	0.325200573	0.1312	996	38
C1-29	3.733	0.9517	0.292680288	0.1564	927	39
C1-30	3.5553	0.9371	0.286481915	0.1112	938	40
C1-31	3.2974	0.8672	0.273108622	0.114	963	43
C1-32	3.2872	0.7774	0.268838926	0.1592	996	45
C1-33	4.1214	0.9785	0.320043153	0.0763	947	37
C1-34	3.8629	0.8769	0.315221241	0.1161	1012	39
C1-35	3.3576	0.5816	0.218013143	0.0879	903	49
C1-36	3.5411	0.5942	0.244089251	0.0876	967	48
C1-37	3.4988	0.604	0.253211658	0.1431	1003	48
C1-38	3.4775	0.6326	0.245629412	0.1024	962	47
C1-39	3.5671	0.6174	0.2472065	0.1143	961	47
C1-40	3.5045	0.5502	0.198339906	0.144	819	50
C2-10	7.0208	0.2685	0.37059758	0.0348	1026	35
C2-11	7.0818	0.2828	0.335351446	0.0572	919	35
C2-12	7.0563	0.2691	0.360062501	0.003	993	36
C2-14	6.2063	0.2618	0.301030643	0.0261	935	40
C2-16	6.343	0.2516	0.322559221	0.072	986	39
C2-17	6.8348	0.2763	0.344874424	0.0453	976	36
C2-18	6.2881	0.2466	0.319747539	0.044	987	39
C2-19	5.9932	0.2696	0.272929257	0.0543	872	40
C2-20	6.1517	0.295	0.318762234	0.0335	980	39
C2-21	5.9365	0.28	0.283423492	0.0129	908	40
C2-22	6.2198	0.2932	0.292080605	0.0423	893	38
C2-23	6.3391	0.2861	0.290839421	0.0205	879	38
C2-24	6.3042	0.2934	0.290786324	0.0001	880	38
C2-25	6.2	0.2857	0.309334075	0.0001	950	38
C2-26	5.3648	0.2661	0.247904362	0.0514	873	44
C2-27	5.8305	0.2751	0.307684344	0.0001	1000	41
C2-28	6.1041	0.2741	0.319128366	0.0325	997	40
C2-29	5.0329	0.2136	0.225637065	0.0001	865	47
C2-30	7.2124	0.3284	0.342027125	0.0272	906	34
C2-31	7.5157	0.3287	0.323885545	0.0489	830	33
C2-32	7.3462	0.315	0.37834511	0.0579	988	33
C2-33	6.4396	0.3096	0.317353842	0.068	934	37
C2-34	6.1377	0.2734	0.262426188	0.0001	822	39
C2-35	6.4574	0.2778	0.307726013	0.0347	917	38
C2-36	5.6367	0.2599	0.263760254	0.0001	893	42
C2-37	6.2727	0.2642	0.263798425	0.0001	814	39
C2-38	7.3645	0.312	0.336348773	0.0141	881	34
C2-41	7.1506	0.3231	0.367802903	0.0001	981	34
C2-42	5.5996	0.2612	0.284939299	0.0001	967	43
Table 4 - EPMA monazite data
Spot No.	Th (wt%)	U (wt%)	Pb (wt%)	Dy (wt%)	Age (Ma)	1SD
SH-11 (in matrix) contd.
C2-43	5.9321	0.2515	0.285825066	0.0001	928	41
C2-44	6.367	0.265	0.31785931	0.0567	963	38
C2-45	5.625	0.2333	0.252122898	0.0001	868	43
C2-46	5.3136	0.3052	0.270223515	0.0146	938	43
C2-49	6.5284	0.2701	0.296437398	0.0447	879	37
C2-50	5.9517	0.2737	0.255658505	0.0238	822	40
C2-51	5.4585	0.3045	0.252620027	0.0094	860	42
C2-52	5.9178	0.2811	0.265485994	0.0137	854	40
C2-53	6.0407	0.2532	0.26877913	0.0001	860	40
C2-54	5.9879	0.2635	0.328266392	0.0001	1046	40
C2-55	6.0291	0.2662	0.284132293	0.0081	904	40
C2-57	6.5108	0.313	0.303570441	0.0375	885	37
C2-58	6.4372	0.2741	0.31299629	0.0395	936	38
C2-60	6.8356	0.2807	0.32905139	0.0171	931	36
SH11-1-2	4.18	0.1549	0.135092481	0.2207	639	55
SH11-1-4	4.4776	0.2349	0.199072998	0.0504	835	51
SH11-1-6	4.2743	0.2736	0.187426577	0.0423	798	52
SH11-1-7	4.9212	0.2289	0.228210321	0.0746	884	47
SH11-1-9	4.8525	0.2327	0.16905694	0.1944	667	47
SH11-1-10	4.6441	0.2303	0.195525323	0.0266	798	50
SH11-1-11	4.2566	0.2681	0.217193666	0.0001	927	52
SH11-1-12	4.8789	0.1788	0.210282799	0.012	847	48
SH11-1-14	4.4742	0.2824	0.198848809	0.04	810	50
SH11-2-1	4.4716	0.2961	0.235524336	0.0151	947	50
SH11-2-3	4.5564	0.3516	0.209353046	0.0379	807	47
SH11-2-4	4.5716	0.3781	0.247876938	0.0442	933	46
SH11-2-6	4.3563	0.3688	0.209971955	0.0096	829	48
SH11-2-7	4.4084	0.3484	0.230618198	0.0658	910	49
SH11-2-8	4.751	0.346	0.235769249	0.0001	879	47
SH11-2-10	4.9151	0.2959	0.262692679	0.0001	976	46
SH11-2-11	5.0393	0.3349	0.232875849	0.0577	834	44
SH11-2-12	5.0583	0.3268	0.264156501	0.0001	944	45
SH11-2-14	4.9502	0.3018	0.223043268	0.027	826	46
SH11-2-16	4.3355	0.2605	0.235567853	0.0414	992	53
SH11-2-17	4.4089	0.2959	0.220222597	0.0001	898	50
SH11-2-19	5.3545	0.1469	0.126007839	0.232	481	45
SH11-2-21	4.8041	0.2616	0.248110169	0.0696	959	48
SH11-2-23	4.7567	0.2939	0.20131701	0.0339	776	47
SH11-2-24	5.0177	0.2985	0.248372516	0.021	908	46
SH11-2-25	4.8408	0.2749	0.262937371	0.0211	1001	48
SH11-2-27	4.8724	0.2928	0.246629253	0.0347	927	47
SH11-2-28	5.1316	0.2923	0.271965256	0.0361	977	45
SH11-2-29	4.9969	0.2778	0.262866312	0.0136	974	47
SH11-2-30	4.905	0.2848	0.234347512	0.0163	881	48
SH11-2-32	4.7824	0.265	0.236654904	0.0575	918	48
SH11-2-35	4.5525	0.2946	0.23101569	0.0058	917	49
SH11-2-36	4.6092	0.2166	0.23181273	0.0342	955	51
SH11-2-38	4.8018	0.1985	0.234476661	0.0279	943	51
SH-11 (in garnet; n=70)
28-m1-1	4.3408	0.4556	0.242183469	0.095	908	46
28-m1-4	3.5076	0.6858	0.266014974	0.1494	1001	45
28-m1-5	3.6614	0.7498	0.263600058	0.1934	936	43
28-m1-6	4.6397	0.4756	0.285062966	0.0459	1002	44
28-m1-7	3.6301	0.7404	0.247184416	0.1818	890	44
Table 4 - EPMA monazite data
Spot No.	Th (wt%)	U (wt%)	Pb (wt%)	Dy (wt%)	Age (Ma)	1SD
SH-11 (in garnet) contd.
28-m1-8	3.6377	0.7441	0.260109364	0.1247	931	44
28-m1-9	3.4335	0.8475	0.259809199	0.1865	910	43
28-m1-11	3.3429	0.815	0.248795088	0.2344	900	43
28-m1-12	3.4427	0.893	0.271596154	0.1331	926	42
28-m1-13	3.4423	0.873	0.307870546	0.1542	1052	42
28-m1-14	3.3438	0.7937	0.28707378	0.1948	1041	44
28-m1-15	4.5859	0.4628	0.281038018	0.0805	1003	44
28-m1-16	3.4157	0.8998	0.312194405	0.1776	1056	41
28-m1-20	3.7998	0.5811	0.242781238	0.1836	928	47
28-m1-21	3.3508	0.7818	0.238441463	0.1411	879	45
28-m1-23	3.3145	0.4797	0.218542826	0.1528	973	54
28-m1-24	3.4624	0.8085	0.250895649	0.1499	894	43
28-m1-25	3.8864	0.7079	0.266246479	0.1406	934	43
28-m1-27	3.6099	0.6889	0.282949043	0.2634	1042	45
28-m1-28	3.7232	0.7613	0.28883318	0.1803	1006	43
28-m1-29	3.1396	0.6649	0.257970625	0.3571	1047	49
28-m1-30	3.4084	0.8246	0.286635348	0.1897	1013	43
28-m1-31	3.2664	0.8986	0.293267193	0.1596	1019	42
28-m1-32	3.6642	0.7898	0.25550842	0.1967	891	43
28-m1-33	3.8211	0.4847	0.273635259	0.0874	1094	49
28-m1-34	3.6386	0.4645	0.227939724	0.0716	962	51
28-m1-35	3.711	0.7424	0.289817792	0.139	1021	43
28-m1-36	4.3107	0.3388	0.259143189	0.004	1041	50
28-m1-37	4.4027	0.4088	0.261966533	0.0001	994	47
28-m1-38	4.4785	0.4423	0.277788036	0.1088	1020	45
28-m1-39	4.3944	0.4322	0.269683911	0.0467	1010	46
29-m1-40	4.502	0.4513	0.253317449	0.0509	926	45
29-m1-41	4.4043	0.4731	0.28665662	0.0971	1046	45
29-m1-42	4.4983	0.4716	0.275650086	0.0099	993	45
29-m1-43	4.1381	0.4439	0.237459514	0.0407	927	47
29-m1-44	3.983	0.6101	0.237444984	0.0866	868	45
29-m1-45	4.1158	0.5928	0.27810544	0.1682	997	44
29-m1-46	4.4185	0.4698	0.244538955	0.0803	898	45
29-m1-47	4.2383	0.4168	0.225963342	0.0689	883	47
29-m1-48	4.1716	0.4887	0.243822521	0.1088	922	46
29-m1-49	4.2229	0.5168	0.244029055	0.0416	901	45
29-m1-50	3.6767	0.5811	0.238770437	0.1625	932	48
29-m1-51	4.2194	0.4743	0.238089808	0.1414	902	46
29-m1-52	4.1451	0.535	0.242510707	0.1083	898	45
29-m1-53	3.5088	0.9164	0.304506572	0.1233	1010	41
29-m1-54	4.315	0.451	0.270204404	0.1143	1015	47
29-m1-55	4.3227	0.4935	0.263754531	0.0745	968	45
29-m1-56	4.4698	0.4306	0.269350736	0.0821	998	46
29-m1-57	4.4545	0.371	0.24680678	0.0067	951	47
29-m1-58	4.4008	0.4536	0.248130035	0.049	921	46
29-m1-59	4.3955	0.4418	0.266329187	0.0399	993	46
29-m1-60	4.507	0.3855	0.249124544	0.0145	944	47
29-m1-61	4.5653	0.3493	0.23517476	0.0124	902	46
29-m1-62	4.2454	0.4692	0.229325227	0.0154	868	46
29-m1-63	4.2637	0.4753	0.2552454	0.0675	956	46
29-m1-64	4.3266	0.4662	0.258006681	0.1014	961	46
29-m1-65	4.3446	0.4729	0.250290643	0.088	927	45
29-m1-66	4.4301	0.4671	0.263915987	0.0638	965	45
29-m1-67	4.2802	0.4576	0.224379776	0.0297	851	46
29-m1-68	4.61	0.3837	0.23682626	0.0039	885	46
29-m1-69	4.1826	0.4511	0.254443377	0.033	979	47
Table 4 - EPMA monazite data
Spot No.	Th (wt%)	U (wt%)	Pb (wt%)	Dy (wt%)	Age (Ma)	1SD
SH-11 (in garnet) contd.
29-m1-70	4.4252	0.4451	0.273594966	0.0807	1012	46
29-m1-71	4.0294	0.5161	0.262636183	0.1212	998	46
29-m1-72	3.6471	0.7722	0.266184726	0.1504	937	43
29-m1-73	4.3589	0.4719	0.275133642	0.1448	1013	46
29-m1-74	4.3221	0.5018	0.259120211	0.1115	947	45
29-m1-75	4.473	0.4563	0.244887135	0.0765	898	45
29-m1-76	4.6156	0.4633	0.238425699	0.0211	853	44
29-m1-77	4.3421	0.4702	0.264758689	0.027	980	45
29-m1-78	4.3122	0.5113	0.268838889	0.0744	978	44
